# Supplementary material for: A phenothiazine-based turn-on fluorescent probe for the selective detection of hydrogen sulfide in food, live cells and animals
Source: Royal Society of Chemistry journal article supplement (doi:10.1039/d1an01762d), 2021-01-01
Supplement: d1an01762d1.pdf [file d1an01762d1.pdf]

**Electronic Supplementary Material (ESI) for Analyst. This journal is © The Royal Society of Chemistry 2021**

## **Electronic Supplementary Information**

### **A phenothiazine-based turn-on fluorescent probe for the selective detection of hydrogen sulfide in food, live cells and animals**

Yaoyun Hu,<sup>a†</sup> Zhuye Shang,<sup>a†</sup> Juan Wang,<sup>b</sup> Min Hong,<sup>\*b</sup> Run Zhang,<sup>c</sup> Qingtao Meng<sup>\*a</sup> and Zhiqiang Zhang<sup>\*a</sup>

<sup>a</sup> School of Chemical Engineering, University of Science and Technology Liaoning, Anshan, Liaoning, 114051, P. R. China.

E-mail: [qtmeng@ustl.euu.cn](mailto:qtmeng@ustl.euu.cn); [zzq@ustl.euu.cn](mailto:zzq@ustl.euu.cn), Tel.: +86-412-5929627

<sup>b</sup> School of Chemistry and Chemical Engineering, Liaocheng University, Liaocheng 252059, China.

E-mail: [hongmin@lcu.edu.cn](mailto:hongmin@lcu.edu.cn)

<sup>c</sup> Australian Institute for Bioengineering and Nanotechnology, The University of Queensland, Brisbane, 4072, Australia.

† These authors contributed equally to this work and they should be regarded as co-first author.

## Reagents and materials

Phenothiazine, malononitrile, phenyl isothiocyanate and 1,8-diazabicyclo[5.4.0]undec-7-ene were purchased from Aladdin reagent Co. (Shanghai, China). 1-Bromopropane, piperidine, phosphorus oxychloride, anions (sodium salts) and biothiols were obtained from Sinopharm Chemical Reagent Co., Ltd. (China). Sodium hypochlorite (NaOCl) and 3-morpholinopyrrolidine (SIN-1) (ONOO<sup>-</sup> donor) were purchased from Alfa Aesar. All the experiments of live zebrafish were performed in compliance with relevant local laws and institute guidelines. Unless otherwise stated, solvents and reagents were of analytical grade from commercial suppliers and were used without further purification. Deionized water was used throughout.

## Apparatus

<sup>1</sup>H NMR and <sup>13</sup>C NMR spectra were recorded with an AVANCE600MHZ spectrometer (BRUKER) with chemical shifts reported as *ppm* (in CDCl<sub>3</sub>, TMS as internal standard). Coupling constants (*J* values) are reported in hertz. API mass spectra were recorded on an Agilent 6530 QTOF spectrometer. Absorption spectra were measured with a Perkin Elmer Lambda 900 UV-vis spectrophotometer (USA). High-performance liquid chromatography (HPLC) analysis was performed on Agilent 1100 Series with methanol-H<sub>2</sub>O (9/1, v/v) as the eluent. Fluorescence spectra were measured with Perkin Elmer LS55 luminescence spectrometer (USA). All pH measurements were carried out with an OHAUS Starter 3100/f meter (USA). H<sub>2</sub>S in adult zebrafish and nude mice were imaged by a SPECTRAL Ami Imaging Systems (Spectral Instruments Imaging, LLC, Tucson, AZ) with an excitation filter 465 nm and an emission filter 610 nm. All the data were

calculated using the region of interest (ROI) function of Amiview Analysis software (Version 1.7.06).

### **Preparation of stock solutions of PR and analytes**

Stock solution of **PR** at the concentration of 0.5 mM was prepared by dissolving certain amount of **PR** in dimethylformamide (DMF). For the detection of H<sub>2</sub>S in buffer, the stock solution of **PR** was diluted into 20 mM phosphate-buffered saline (PBS) of pH 7.4 (DMF: H<sub>2</sub>O=7:3, v/v, 20 mM, pH=7.4) for all spectrometric measurements. For spectroscopic titration measurements of **PR** to H<sub>2</sub>S, the spectra were recorded after mixing **PR** with analytes at room temperature. NaHS was used as H<sub>2</sub>S source. Solutions of a series of anions and biothiols (20 mM) were freshly prepared by dissolving corresponding chemicals in deionized water. The ROS species were prepared in deionized water according to the previous literatures.<sup>1-3</sup> A stock solution of HOCl was prepared by diluting of the commercial NaOCl solution and stored. Hydroxylradical ( $\cdot\text{OH}$ ) was generated in the Fenton system from ferrous ammonium sulfate and hydrogen peroxide. Superoxide anion radical ( $\text{O}_2^-$ ) was generated from the xanthine-xanthine oxidase system. Singlet oxygen ( $^1\text{O}_2$ ) was generated from the Na<sub>2</sub>MoO<sub>4</sub>-H<sub>2</sub>O<sub>2</sub> system in 0.05 M carbonate buffer of pH 10.5. ONOO<sup>-</sup> was obtained by using SIN-1 as a donor. Hydrogen peroxide (H<sub>2</sub>O<sub>2</sub>) was diluted immediately from a stabilized 30% solution, and was assayed using its molar absorption coefficient of 43.6 M<sup>-1</sup> cm<sup>-1</sup> at 240 nm.

### **MTT assay of cytotoxicity of PR in HeLa cells**

The cytotoxicity of **PI** to live HeLa cells was investigated by MTT assays.<sup>4</sup> The following formula was used to calculate the viability of cell growth: Viability (%)=(mean of absorbance value of treatment group-blank)/(mean absorbance value

of control-blank)×100.

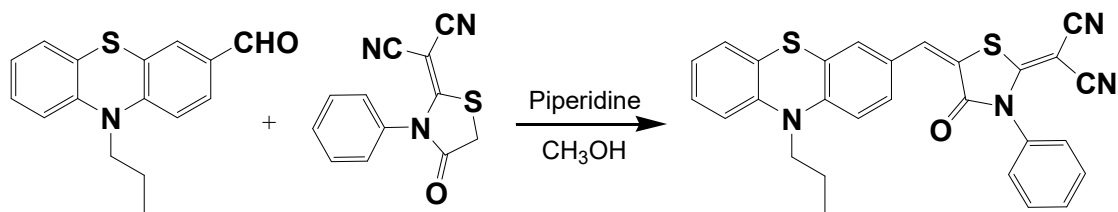

**Scheme S1** Synthetic procedure of fluorescent probe **PR**.

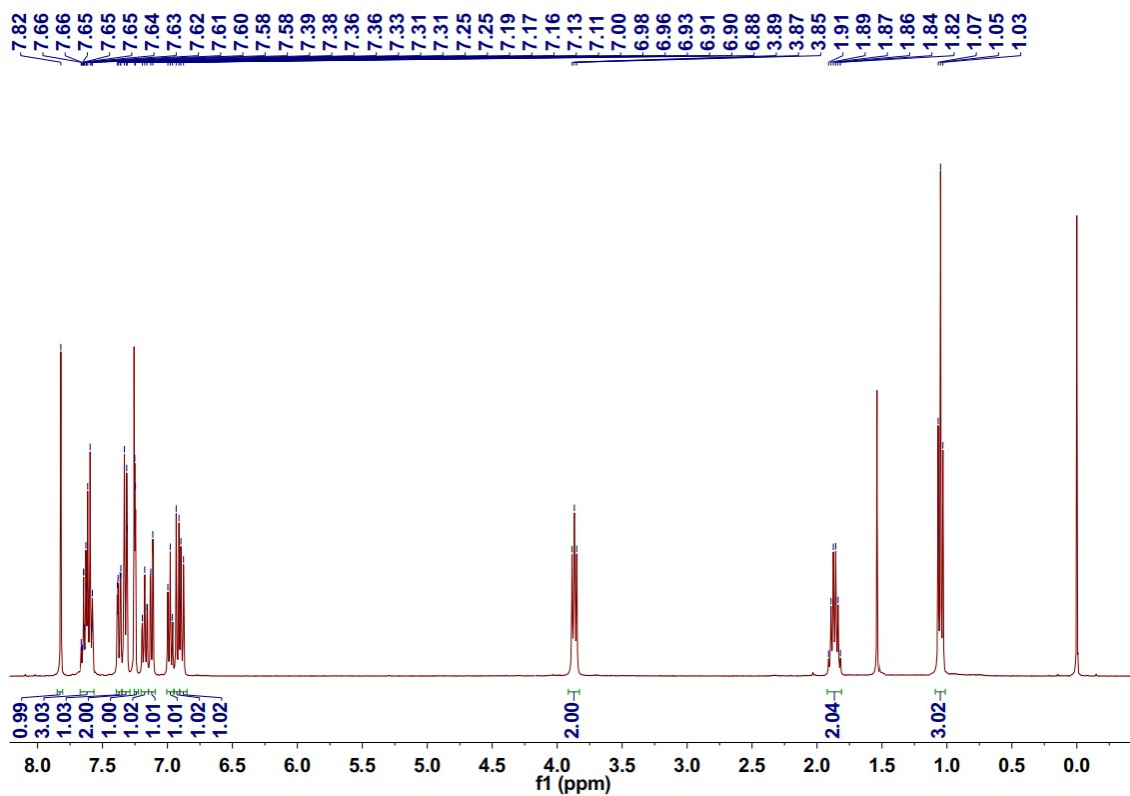

**Fig. S1**  $^1\text{H}$  NMR of Probe **PR** (600 MHz,  $\text{CDCl}_3$ ).

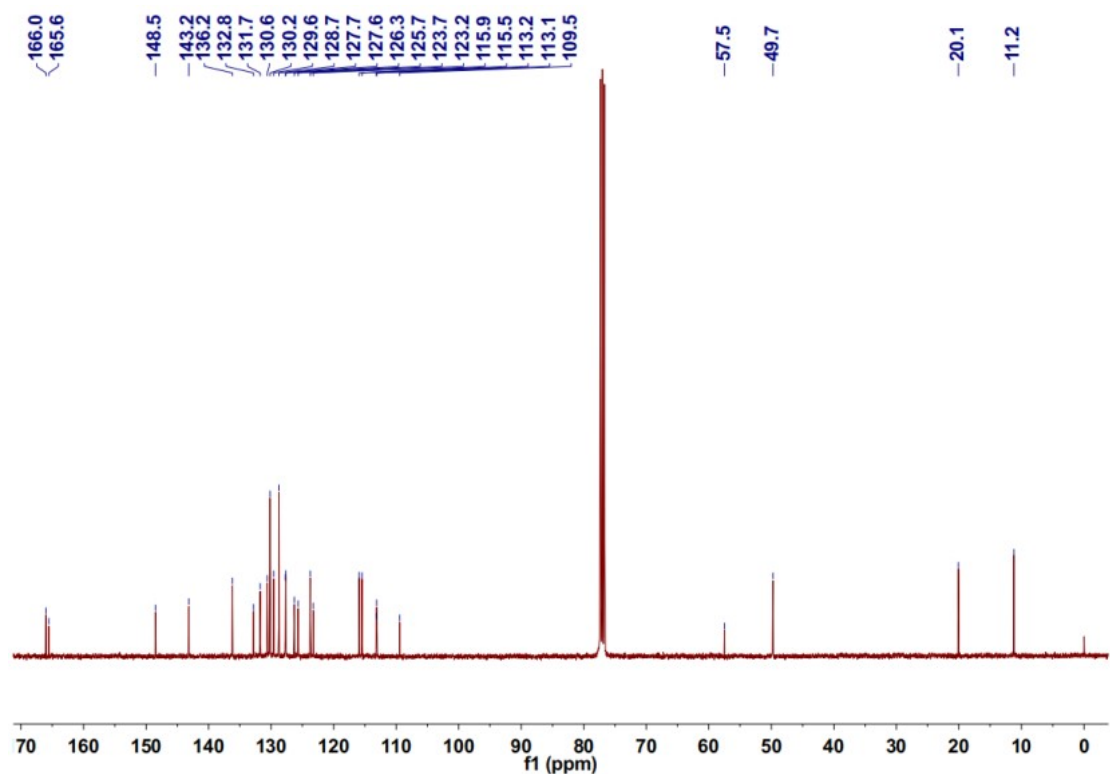

Fig. S2  $^{13}\text{C}$  NMR of Probe **PR** (150 MHz,  $\text{CDCl}_3$ ).

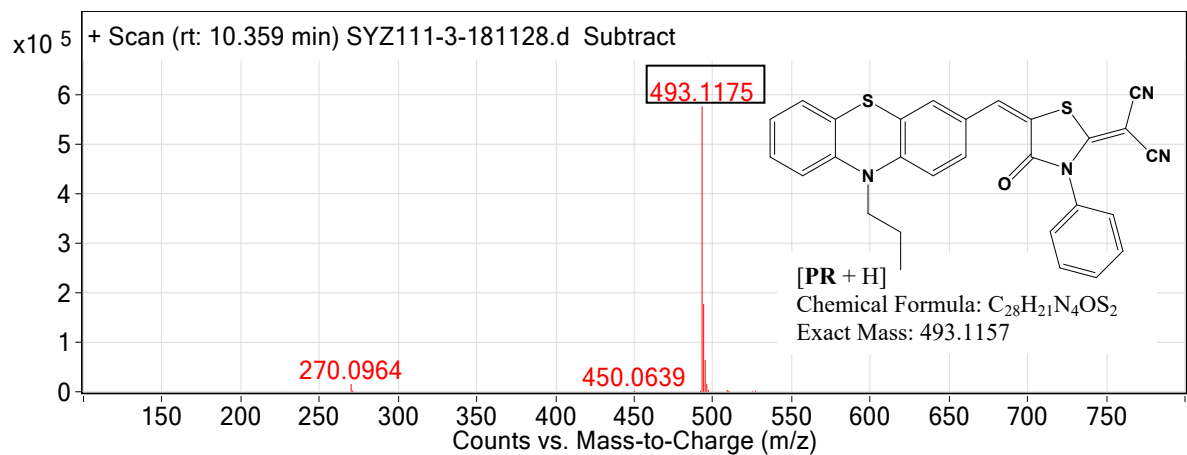

Fig. S3 HRMS of Probe **PR**.

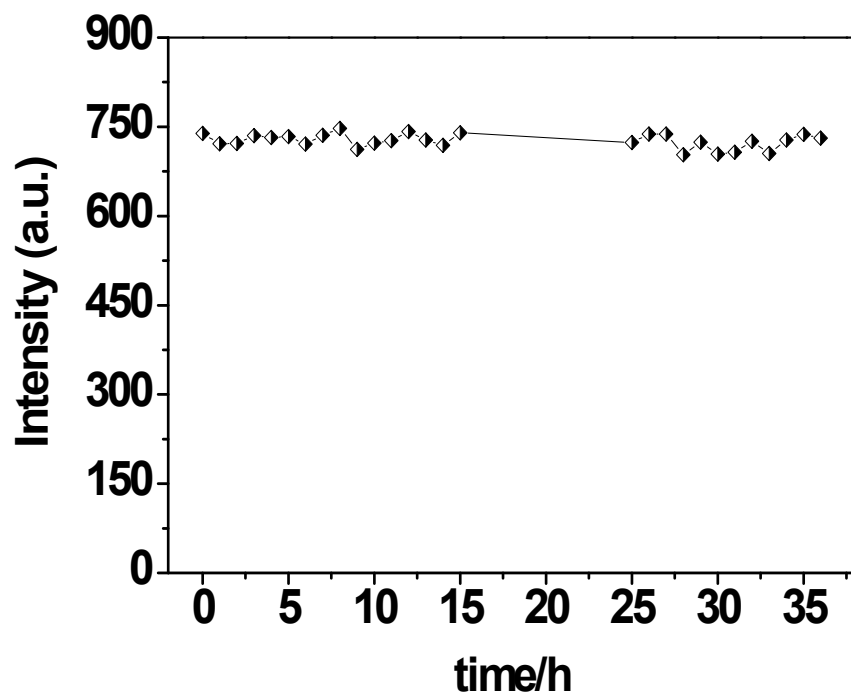

**Fig. S4** Fluorescence intensities of Probe **PR** (10  $\mu\text{M}$ ) in PBS aqueous buffer (DMF: PBS=7:3, 20 mM, pH=7.4). The intensities were recorded at 596 nm, excitation at 425 nm.

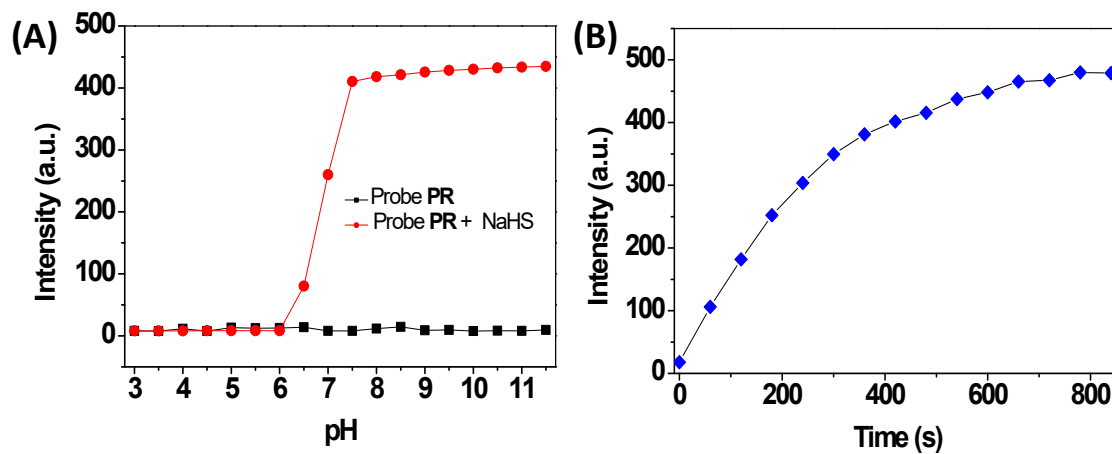

**Fig. S5** (A) pH-dependent fluorescence intensity of **PR** in the absence and presence of NaHS (150  $\mu\text{M}$ ). (B) Time-dependent fluorescence spectra of **PR** (10  $\mu\text{M}$ ) upon the addition of 150  $\mu\text{M}$  NaHS in PBS aqueous buffer (DMF: PBS=7:3, 20 mM, pH=7.4). The intensities were recorded at 596 nm, excitation at 425 nm.

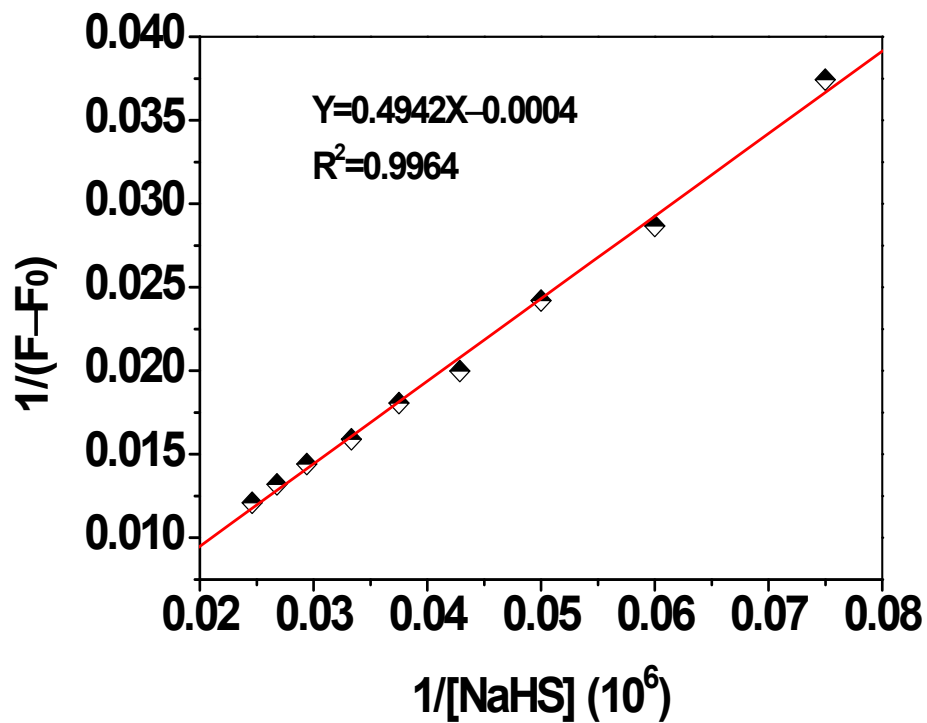

**Fig. S6** Benesi-Hildebrand plot (emission at 596 nm) of Probe **PR** (10  $\mu$ M) based on 1:1 binding stoichiometry with NaHS. Excitation at 425 nm.

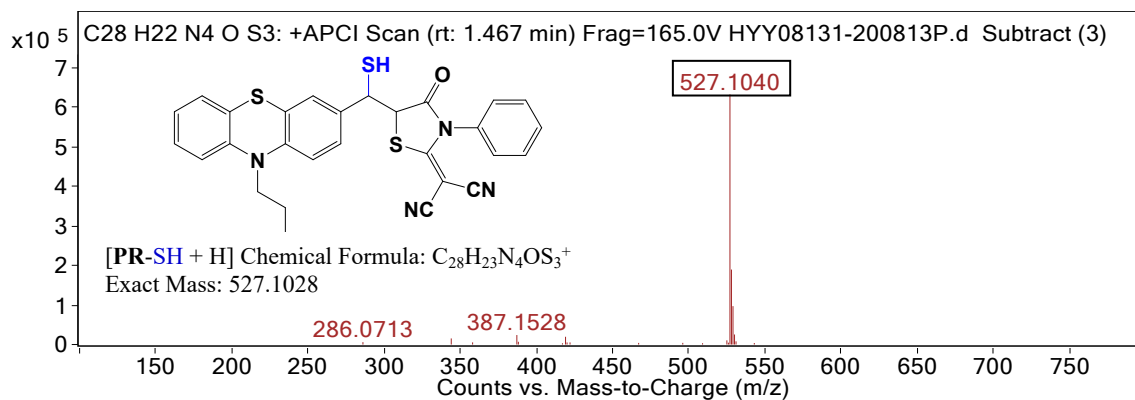

**Fig. S7** HRMS of **PR** in the presence of NaHS.

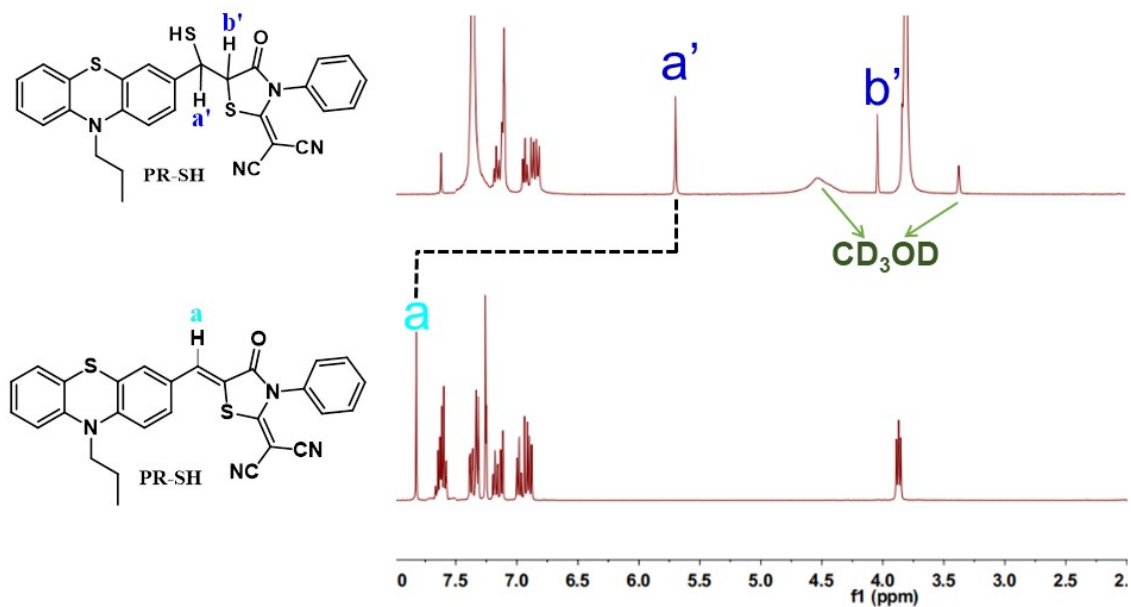

**Fig. S8**  $^1\text{H}$  NMR titration of **PR** in the absence and presence of NaHS in a  $\text{CDCl}_3/\text{CD}_3\text{OD}/\text{D}_2\text{O}$  mixed solution (400 MHz).

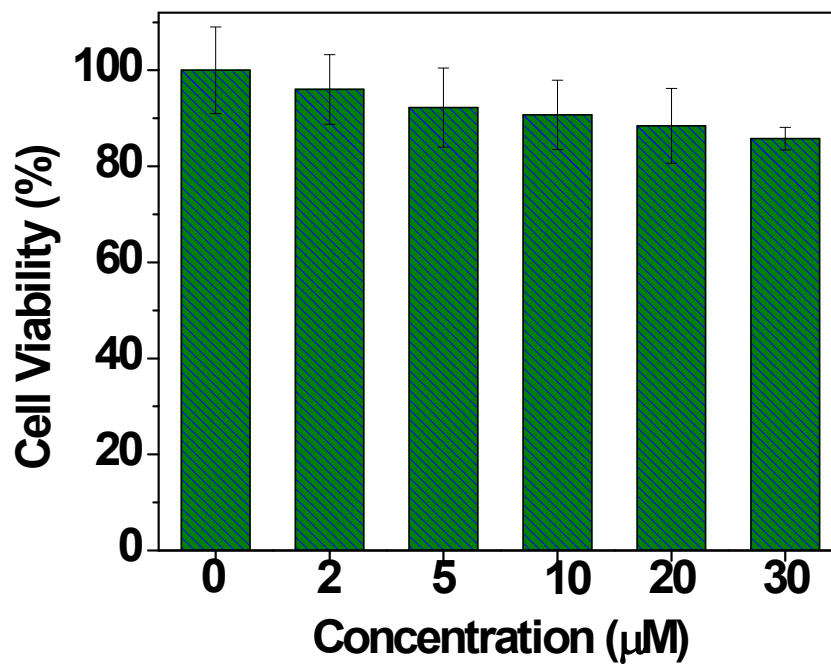

**Fig. S9** Cytotoxicity of **PR** towards HeLa cells estimated by MTT assay.



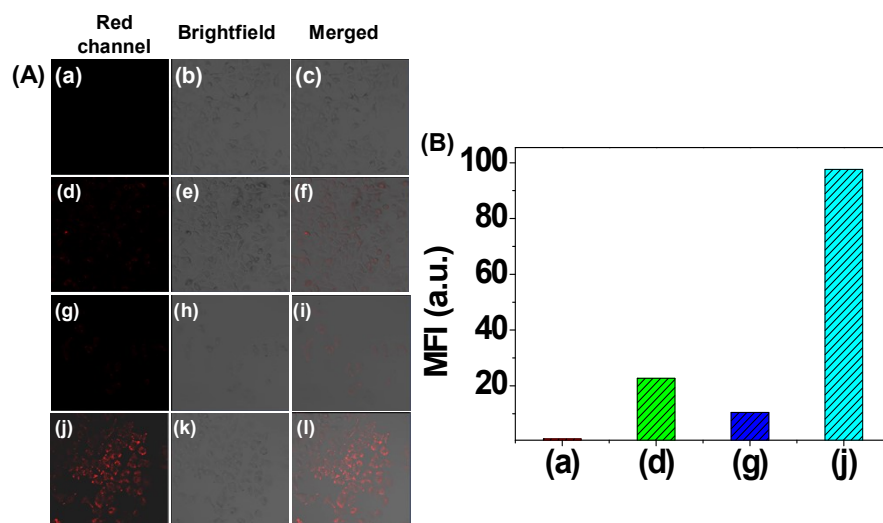

**Fig. S10** Confocal imaging of exogenous H<sub>2</sub>S with PR in live cells. (a-c) Control A549 cells. (d-f) A549 cells incubated with only PR (5  $\mu$ M) for 15 min. (g-i) A549 cells treated with NEM (1 mM) for 60 min and then PR (5  $\mu$ M) for another 15 min. (j-l) NEM (1 mM) pre-treated A549 cells incubated with PR (5  $\mu$ M) and then NaHS (150  $\mu$ M) for another 15 min. The images were acquired using a confocal microscope with 488 nm excitation and 610 nm collection. (B) Mean fluorescence intensity per A549 cell of (a), (d), (g) and (j). Scale bar, 30  $\mu$ m.

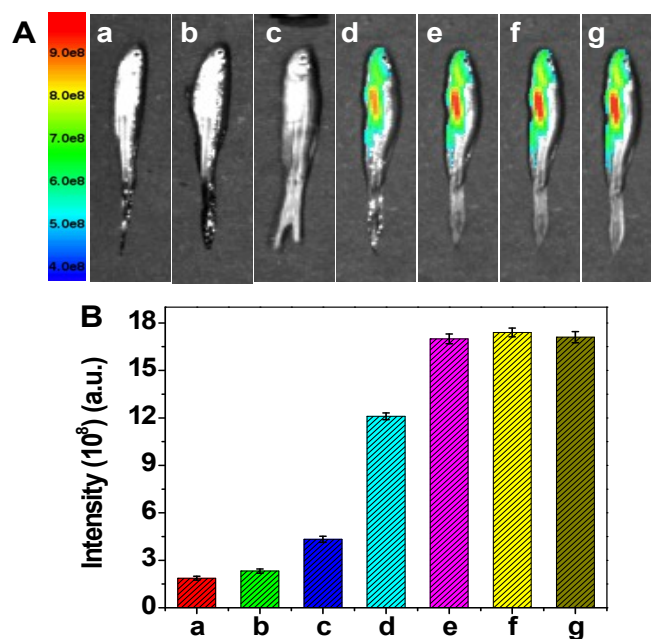

**Fig. S11** (A) Fluorescence imaging of exogenous H<sub>2</sub>S in live zebrafish with PR (10  $\mu$ M). (a) Blank zebrafish. (b) Zebrafish treated with NaHS (150  $\mu$ M) for 3 min only. (c) Zebrafish treated with PR (10  $\mu$ M) only. (d) Zebrafish was pre-incubated with NaHS (150  $\mu$ M) for 3 min and then PR (10  $\mu$ M) for 2 min. The images were taken in the following (e) 5 min, (f) 10 min and (g) 12 min. (B) Mean fluorescence intensity of zebrafish shown in (a–g). The images of zebrafish were recorded with an excitation filter (465 nm) and an emission filter (610 nm).

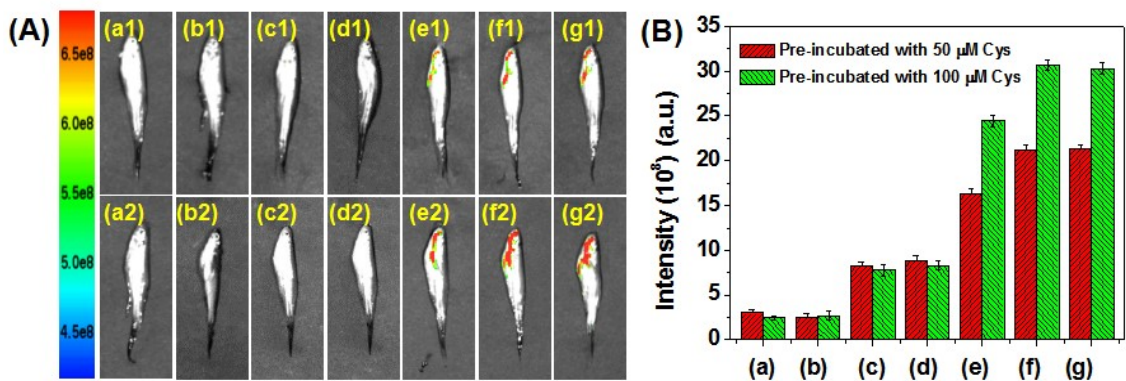

**Fig. S12** (A) Fluorescence imaging of H<sub>2</sub>S endogenously produced by Cys in live zebrafish with **PR** (10 μM). (a1, a2) Control zebrafish. Zebrafish incubated with (b1) 50 μM Cys and (b2) 100 μM Cys for 60 min. (c1,c2) Zebrafish incubated with **PR** (10 μM) for 20 min. (d1, d2) Zebrafish incubated with 100 μM NEM for 15 min and then **PR** (10 μM) for 20 min. Zebrafish incubated with 50 μM Cys for 60 min and then **PR** (10 μM) for (e1) 10 min, (f1) 20 min (g1) and 30 min. Zebrafish incubated with 100 μM Cys for 60 min and then **PR** (10 μM) for (e2) 10 min, (f2) 20 min and (g2) 30 min. (B) Mean fluorescence intensity of zebrafish shown in (a–g). The images of zebrafish were recorded with an excitation filter (465 nm) and an emission filter (610 nm).

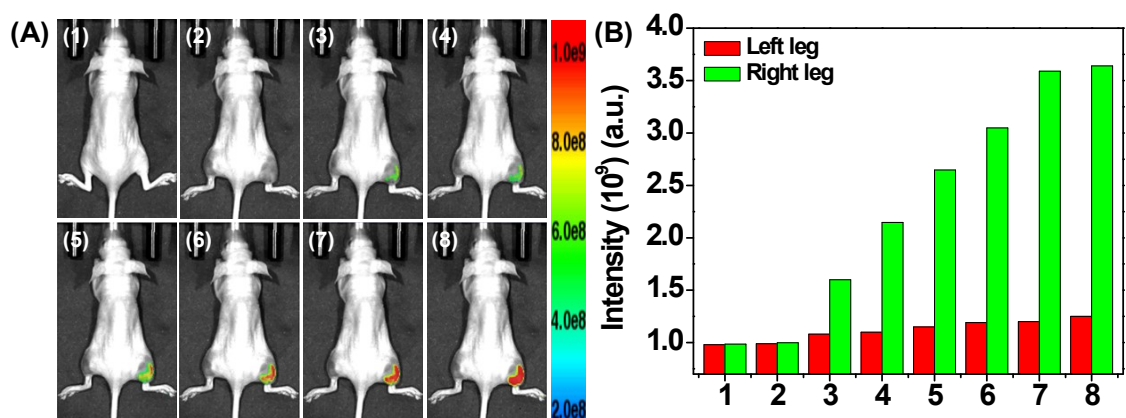

**Fig. S13** (A) Fluorescence imaging of exogenous H<sub>2</sub>S in live nude mouse with **PR**. (1) Blank nude mouse. (2) **PR** (10 μM, 125 μL) was subcutaneously injected into the left and right legs of mouse. Followed by the injection of PBS (2 mM, 10 μL) into the left leg and NaHS (2 mM, 10 μL) to the right leg areas of interest. The images were then recorded at different times: (3) 2 min, (4) 4 min, (5) 6 min, (6) 8 min, (7) 10 min and (8) 15 min, respectively. (B) Mean fluorescence intensity of interested area at the different times shown in Fig. 8A. The images of nude mouse were recorded with an excitation filter (465 nm) and an emission filter (610 nm).

**Table S1.** Comparison of this work with reported fluorescent probes for H<sub>2</sub>S detection.

| Probes                   | Red-Emission  | Detection limit | Response time | Detection of H <sub>2</sub> S intake in live animals | Detection of H <sub>2</sub> S intake in cell | Detection of H <sub>2</sub> S in corrupt food | Ref.             |
|--------------------------|---------------|-----------------|---------------|------------------------------------------------------|----------------------------------------------|-----------------------------------------------|------------------|
| M-H <sub>2</sub> S       | 560 nm/650 nm | 39.1 nM         | 12 min        | Yes                                                  | Yes                                          | No                                            | 5                |
| Ru-NBD                   | 644nm         | 88 nM           | 4 min         | No                                                   | Yes                                          | No                                            | 6                |
| KF-DNBS                  | 500 nm        | 3.2 μM          | 40 min        | No                                                   | No                                           | No                                            | 7                |
| H-LDS                    | 550 nm        | 0.57 mM         | 10 min        | No                                                   | Yes                                          | No                                            | 8                |
| CMDN                     | 460 nm        | 0.207 μM        | 13 min        | Yes                                                  | Yes                                          | No                                            | 9                |
| BSCN                     | 515 nm        | 17 nM           | 60 min        | No                                                   | Yes                                          | No                                            | 10               |
| CDs-PNBD                 | 440 nm/543 nm | 57 nM           | 100 min       | No                                                   | No                                           | No                                            | 11               |
| P1                       | 530 nm        | 1.06 μM         | 10 min        | No                                                   | Yes                                          | No                                            | 12               |
| DCI-NCN                  | 618 nm        | 50 nM           | 15 min        | Yes                                                  | Yes                                          | No                                            | 13               |
| NBD-CMC                  | 530 nm/665 nm | 0.5 μM          | 1 min         | No                                                   | Yes                                          | No                                            | 14               |
| Dye-H <sub>2</sub> S-Gal | 545 nm        | 195 nM          | 1 min         | No                                                   | Yes                                          | No                                            | 15               |
| DPQI                     | 465 nm/593 nm | 3.5 μM          | 2 min         | No                                                   | Yes                                          | No                                            | 16               |
| SPy-DNs                  | 608 nm        | 356 nM          | 4 s           | NO                                                   | Yes                                          | Yes                                           | 17               |
| DCM-OCN                  | 690 nm        | 0.28 μM         | 2 min         | No                                                   | No                                           | No                                            | 18               |
| FLVN-OCN                 | 525 nm        | 0.25 μM         | 15 min        | No                                                   | Yes                                          | No                                            | 19               |
| MI-H <sub>2</sub> S      | 663 nm        | 19 nM           | 3 min         | Yes                                                  | Yes                                          | No                                            | 20               |
| DC-NBD                   | 744 nm        | 26 nM           | 3 min         | Yes                                                  | Yes                                          | No                                            | 21               |
| PR                       | 596 nm        | 1.8 μM          | 10 min        | Yes                                                  | Yes                                          | Yes                                           | <b>This work</b> |

**References:**

1. Q. Han, F. Zhou, Y. Wang, H. Feng, Q. Meng, Z. Zhang and R. Zhang, *Molecules*, 2019, **24**, 2455.
2. R. Zhang, L. Liang, Q. Meng, J. Zhao, H. T. Ta, L. Li, Z. Zhang, Y. Sultanbawa and Z. P. Xu.

*Small*, 2018, 1803712.

3. W.-L. Wu, X. Zhao, L.-L. Xi, M.-F. Huang, W.-H. Zeng, J.-Y. Miao and B.-X. Zhao, *Anal. Chim. Acta*, 2017, **950**, 178–183.
4. H. Feng, Z. Zhang, Q. Meng, H. Jia, Y. Wang and R. Zhang, *Adv. Sci.*, 2018 1800397.
5. W. Shu, S. P. Zang, C. Wang, M. X. Gao, J. Jing and X. L. Zhang, *Anal. Chem.*, 2020, **92**, 9982–9988.
6. J. Yuan, T. B. Ren, S. Xu, C. J. Wang, X. B. Zhang and L. Yuan, *ACS Appl. Bio Mater.*, 2021, **4**, 6016–6022.
7. S. Lee, D. -B. Sung, J. S. Lee and M. S. Han, *ACS Omega*, 2020, **5**, 32507–32514.
8. X. N. Wang, Y. J. Zuo, Y. Zhang, T. X. Yang and W. Y. Lin, *Anal. Methods*, 2020, **12**, 1064–1069.
9. X. Y. Jing, F. Q. Yu and W. Y. Lin, *New J. Chem.*, 2019, **43**, 16796–16800.
10. F. Hou, L. Zhu, H. Y. Zhang, Z. Qiao, N. N. Wei and Y. R. Zhang, *New J. Chem.*, 2020, **44**, 1537–1541.
11. G. Q. Liu, H. W. Ge, R. H. Yin, L. Yu, C. M. Sun, W. R. Dong, Z. L. Sun, K. A. Alamry, H. M. Marwani and S. H. Wang, *Anal. Methods*, 2020, **12**, 1617–1623.
12. J. L. Yang, C. X. Yin, Y. Wen, Y. B. Zhang and F. J. Huo, *New J. Chem.*, 2020, **44**, 7091–7095.
13. R. Q. Zhou, G. L. Cui, Q. R. Qi, W. C. Huang and L. Yang, *Analyst*, 2020, **145**, 2305–2310.
14. Y. M. Zhang, Y. C. Chen, Y. Bai, X. L. Xue, W. J. He and Z. J. Guo, *Analyst*, 2020, **145**, 4233–4238
15. L. Yi, Y. Wang, T. R. Luo, W. Hu, M. Wang and J. Y. Wang, *Dyes Pigments*, 2019, **166**, 460–466.
16. U. N. Guria, K. Maiti, S. S. Ali, S. K. Samanta, D. Mandal, R. Sarkar, P. Datta, A. K. Ghosh and A. K. Mahapatra, *New J. Chem.*, 2018, **42**, 5367–5375.
17. K. L. Zhong, X. L. Hu, S. Y. Zhou, X. Y. Liu, X. Gao, L. J. Tang and X. M. Yan, *J. Agric. Food Chem.*, 2021, **69**, 4628–4634.
18. Y. L. Jin, R. Liu, Z. X. Zhan and Y. Lv, *Talanta*, 2019, **202**, 159–164.
19. E. Karakus, M. Ucüncü and M. Emrullahoglu, *Anal. Chem.*, 2016, **88**, 1039–1043.
20. S. Gong, Z. Zheng, X. Guan, S. Feng and G. Feng, *Anal. Chem.*, 2021, **93**, 5700–5708.
21. S. Gong, E. Zhou, J. Hong and G. Feng, *Anal. Chem.*, 2019, **91**, 13136–13142.
